# Supplementary material for: Effects of vibegron on ambulatory blood pressure in patients with overactive bladder: results from a double-blind, placebo-controlled trial
Source: PubMed Central journal article supplement — Blood Press Monit. 2021 Oct 25;27(2):128–34. doi: 10.1097/MBP.0000000000000572 (PMC8893125; doi:10.1097/mbp.0000000000000572), 2021-10-25

**Effects of Vibegron on Ambulatory Blood Pressure in Patients With Overactive  
Bladder: Results From a Double-Blind, Placebo-Controlled Trial**

**Supplementary Information**

**Supplementary Table 1. Change From Baseline to Day 28 in Maximum\* Ambulatory Systolic BP, Diastolic BP, and Heart Rate From 0.5 to 6.5 Hours**

| Ambulatory BP Parameter                        | Placebo<br>(N=101) | Vibegron<br>(N=96) |
|------------------------------------------------|--------------------|--------------------|
| Systolic BP, mmHg                              |                    |                    |
| Mean (SD) baseline                             | 136.1 (12.7)       | 135.0 (13.9)       |
| LS mean change at day 28 (90% CI) <sup>†</sup> | 0.3 (-1.8 to 2.3)  | 2.0 (-0.1 to 4.0)  |
| LS mean difference vs placebo (90% CI)         | 1.7 (-0.8 to 4.2)  |                    |
| Diastolic BP, mmHg                             |                    |                    |
| Mean (SD) baseline                             | 84.2 (9.5)         | 83.1 (9.2)         |
| LS mean change at day 28 (90% CI) <sup>†</sup> | -0.5 (-1.8 to 0.8) | 0.6 (-0.7 to 2.0)  |
| LS mean difference vs placebo (90% CI)         | 1.2 (-0.4 to 2.8)  |                    |
| Heart rate, bpm                                |                    |                    |
| Mean (SD) baseline                             | 85.3 (13.4)        | 86.2 (12.6)        |
| LS mean change at day 28 (90% CI) <sup>†</sup> | 0.3 (-1.8 to 2.4)  | 1.8 (-0.4 to 3.9)  |
| LS mean difference vs placebo (90% CI)         | 1.5 (-1.1 to 4.0)  |                    |

BP, blood pressure; LS, least squares.

\*Defined as the maximum of the hourly means between 0.5 and 6.5 hours post cuff fitting, corresponding to the time to maximum concentration of vibegron.

<sup>†</sup>Placebo, N=96; vibegron, N=92.

**Supplementary Table 2. Change From Baseline to Day 28 in Ambulatory Systolic BP, Diastolic BP, and Heart Rate by Age Subgroup**

| <b>Ambulatory BP Parameter,<br/>Mean (SD)</b> | <b>Age ≤75th Percentile*</b> |                            | <b>Age &gt;75th Percentile*</b> |                            |
|-----------------------------------------------|------------------------------|----------------------------|---------------------------------|----------------------------|
|                                               | <b>Placebo<br/>(N=75)</b>    | <b>Vibegron<br/>(N=76)</b> | <b>Placebo<br/>(N=26)</b>       | <b>Vibegron<br/>(N=20)</b> |
| <b>Daytime systolic BP, mmHg</b>              |                              |                            |                                 |                            |
| Baseline                                      | 125.4 (9.7)                  | 125.3 (11.3)               | 130.0 (12.1)                    | 127.9 (10.4)               |
| Change from baseline at day 28                | 0.2 (6.6)                    | 0.7 (7.9)                  | -1.6 (6.9)                      | 0.6 (8.8)                  |
| <b>Daytime diastolic BP, mmHg</b>             |                              |                            |                                 |                            |
| Baseline                                      | 76.4 (7.9)                   | 77.1 (7.8)                 | 73.7 (9.3)                      | 71.5 (7.3)                 |
| Change from baseline at day 28                | 0.5 (4.5)                    | 0.2 (5.5)                  | -0.4 (4.9)                      | -0.3 (4.7)                 |
| <b>Daytime heart rate, bpm</b>                |                              |                            |                                 |                            |
| Baseline                                      | 77.2 (8.5)                   | 77.6 (8.4)                 | 73.6 (9.1)                      | 74.2 (7.7)                 |
| Change from baseline at day 28                | 0.7 (4.8)                    | 1.5 (5.0)                  | -0.7 (5.2)                      | 0.3 (4.4)                  |
| <b>24-h systolic BP, mmHg</b>                 |                              |                            |                                 |                            |
| Baseline                                      | 121.5 (9.2)                  | 121.5 (11.3)               | 127.3 (11.3)                    | 124.3 (9.9)                |
| Change from baseline at day 28                | 0.2 (5.8)                    | 0.7 (7.3)                  | -1.3 (6.7)                      | 0.0 (8.0)                  |
| <b>24-h diastolic BP, mmHg</b>                |                              |                            |                                 |                            |
| Baseline                                      | 73.1 (7.6)                   | 73.9 (7.6)                 | 71.1 (8.7)                      | 68.9 (6.6)                 |
| Change from baseline at day 28                | 0.6 (3.8)                    | 0.4 (5.2)                  | 0.2 (4.6)                       | -0.7 (4.3)                 |
| <b>24-h heart rate, bpm</b>                   |                              |                            |                                 |                            |
| Baseline                                      | 74.9 (8.0)                   | 75.0 (7.7)                 | 71.9 (8.8)                      | 72.1 (7.2)                 |
| Change from baseline at day 28                | 0.4 (4.4)                    | 1.3 (4.7)                  | -0.9 (5.2)                      | 0.0 (3.3)                  |

| Ambulatory BP Parameter,<br>Mean (SD)               | Age ≤75th Percentile* |                    | Age >75th Percentile* |                    |
|-----------------------------------------------------|-----------------------|--------------------|-----------------------|--------------------|
|                                                     | Placebo<br>(N=75)     | Vibegron<br>(N=76) | Placebo<br>(N=26)     | Vibegron<br>(N=20) |
| Maximum (0.5–6.5 h) systolic BP, mmHg <sup>†</sup>  |                       |                    |                       |                    |
| Baseline                                            | 134.7 (11.9)          | 134.5 (14.6)       | 140.2 (14.2)          | 136.8 (10.8)       |
| Change from baseline at day 28‡                     | -0.1 (9.5)            | 1.3 (11.4)         | -1.0 (11.0)           | 3.1 (13.0)         |
| Maximum (0.5–6.5 h) diastolic BP, mmHg <sup>†</sup> |                       |                    |                       |                    |
| Baseline                                            | 84.7 (8.8)            | 84.3 (9.1)         | 82.9 (11.4)           | 78.6 (8.3)         |
| Change from baseline at day 28‡                     | -0.9 (6.1)            | 0.4 (7.1)          | -1.8 (8.8)            | 0.2 (7.7)          |
| Maximum (0.5–6.5 h) heart rate, bpm <sup>†</sup>    |                       |                    |                       |                    |
| Baseline                                            | 86.7 (12.9)           | 86.9 (12.7)        | 81.1 (14.3)           | 83.3 (12.1)        |
| Change from baseline at day 28‡                     | 0.9 (10.1)            | 1.4 (11.5)         | -1.2 (14.0)           | 1.1 (12.6)         |

BP, blood pressure.

\*75th percentile, 66 years.

<sup>†</sup>Defined as the maximum of the hourly means between 0.5 and 6.5 hours post cuff fitting, corresponding to the time to maximum concentration of vibegron.

‡Age ≤75th percentile: placebo, N=70; vibegron, N=72.

**Supplementary Table 3. Percentage of Patients Meeting Predefined Thresholds for Change From Baseline to Day 28 in Ambulatory Systolic BP, Diastolic BP, and Heart Rate by Age Subgroup**

| Ambulatory BP Parameter,<br>n (%) | Age ≤75th Percentile* |                    | Age >75th Percentile* |                    |
|-----------------------------------|-----------------------|--------------------|-----------------------|--------------------|
|                                   | Placebo<br>(N=75)     | Vibegron<br>(N=76) | Placebo<br>(N=26)     | Vibegron<br>(N=20) |
| Systolic BP, ≥15 mmHg             |                       |                    |                       |                    |
| Mean daytime                      | 2 (2.7)               | 2 (2.6)            | 0 (0)                 | 0 (0)              |
| Mean 24-h                         | 0 (0)                 | 2 (2.6)            | 0 (0)                 | 0 (0)              |
| Maximum (0.5–6.5 h) <sup>†‡</sup> | 4 (5.7)               | 3 (4.2)            | 0 (0)                 | 3 (15.0)           |
| Diastolic BP, ≥10 mmHg            |                       |                    |                       |                    |
| Mean daytime                      | 2 (2.7)               | 2 (2.6)            | 0 (0)                 | 0 (0)              |
| Mean 24-h                         | 0 (0)                 | 1 (1.3)            | 0 (0)                 | 0 (0)              |
| Maximum (0.5–6.5 h) <sup>†‡</sup> | 2 (2.9)               | 7 (9.7)            | 3 (11.5)              | 2 (10.0)           |
| Heart rate, ≥10 bpm               |                       |                    |                       |                    |
| Mean daytime                      | 3 (4.0)               | 2 (2.6)            | 1 (3.8)               | 1 (5.0)            |
| Mean 24-h                         | 2 (2.7)               | 2 (2.6)            | 1 (3.8)               | 1 (5.0)            |
| Maximum (0.5–6.5 h) <sup>†‡</sup> | 14 (20)               | 16 (22.2)          | 3 (11.5)              | 4 (20.0)           |

BP, blood pressure.

\*75th percentile, 66 years.

<sup>†</sup>Defined as maximum of the hourly means between 0.5 and 6.5 hours post cuff fitting, corresponding to the time to maximum concentration of vibegron.

<sup>‡</sup>Age ≤75th percentile: placebo, N=70; vibegron, N=72.

**Supplementary Table 4. Percentage of Patients Meeting Predefined Thresholds for Change From Baseline to Day 28 in Ambulatory Systolic BP, Diastolic BP, and Heart Rate by Pre-existing Hypertension**

| Ambulatory BP Parameter,<br>n (%) | With Pre-existing<br>Hypertension |                    | Without Pre-existing<br>Hypertension |                    |
|-----------------------------------|-----------------------------------|--------------------|--------------------------------------|--------------------|
|                                   | Placebo<br>(N=31)                 | Vibegron<br>(N=38) | Placebo<br>(N=70)                    | Vibegron<br>(N=58) |
| Systolic BP, $\geq 15$ mmHg       |                                   |                    |                                      |                    |
| Mean daytime                      | 1 (3.2)                           | 1 (2.6)            | 1 (1.4)                              | 1 (1.7)            |
| Mean 24-h                         | 0 (0)                             | 1 (2.6)            | 0 (0)                                | 1 (1.7)            |
| Maximum (0.5–6.5 h)*†             | 1 (3.3)                           | 3 (8.3)            | 3 (4.5)                              | 3 (5.4)            |
| Diastolic BP, $\geq 10$ mmHg      |                                   |                    |                                      |                    |
| Mean daytime                      | 1 (3.2)                           | 1 (2.6)            | 1 (1.4)                              | 1 (1.7)            |
| Mean 24-h                         | 0 (0)                             | 1 (2.6)            | 0 (0)                                | 0 (0)              |
| Maximum (0.5–6.5 h)*†             | 2 (6.7)                           | 6 (16.7)           | 3 (4.5)                              | 3 (5.4)            |
| Heart rate, $\geq 10$ bpm         |                                   |                    |                                      |                    |
| Mean daytime                      | 1 (3.2)                           | 1 (2.6)            | 3 (4.3)                              | 2 (3.4)            |
| Mean 24-h                         | 1 (3.2)                           | 1 (2.6)            | 2 (2.9)                              | 2 (3.4)            |
| Maximum (0.5–6.5 h)*†             | 5 (16.7)                          | 7 (19.4)           | 12 (18.2)                            | 13 (23.2)          |

BP, blood pressure.

\*With pre-existing hypertension: placebo, N=30; vibegron, N=36; without pre-existing hypertension: placebo, N=66; vibegron, N=56

†Defined as the maximum of the hourly means between 0.5 and 6.5 hours post cuff fitting, corresponding to the time to maximum concentration of vibegron.

**Supplementary Table 5. Summary of Adverse Events**

|                                                    | <b>Placebo</b> | <b>Vibegron</b> |
|----------------------------------------------------|----------------|-----------------|
| <b>AE, n (%)</b>                                   | <b>(N=108)</b> | <b>(N=106)</b>  |
| ≥1 TEAE                                            | 27 (25.0)      | 49 (46.2)       |
| ≥1 study treatment–related TEAE                    | 10 (9.3)       | 20 (18.9)       |
| ≥1 serious TEAE                                    | 1 (0.9)        | 1 (0.9)         |
| ≥1 study treatment–related serious TEAE            | 0              | 0               |
| Deaths                                             | 0              | 0               |
| TEAEs occurring in ≥2% of patients in either group |                |                 |
| Hypertension*                                      | 4 (3.7)        | 5 (4.7)         |
| Upper respiratory tract infection                  | 1 (0.9)        | 5 (4.7)         |
| Headache                                           | 2 (1.9)        | 4 (3.8)         |
| Nasopharyngitis                                    | 3 (2.8)        | 3 (2.8)         |
| Diarrhea                                           | 1 (0.9)        | 3 (2.8)         |
| Dry mouth                                          | 1 (0.9)        | 3 (2.8)         |
| Nausea                                             | 1 (0.9)        | 3 (2.8)         |
| Urinary tract infection                            | 1 (0.9)        | 3 (2.8)         |
| Fatigue                                            | 0              | 3 (2.8)         |
| Hematuria                                          | 0              | 3 (2.8)         |

AE, adverse event; BP, blood pressure; TEAE, treatment-emergent AE.

\*Hypertension was recorded as an AE of clinical interest if the following criteria applied: for patients without hypertension at baseline, systolic BP ≥140 mmHg or diastolic BP ≥90 mmHg (at 2 consecutive visits for the average of 3 measurements); for patients with baseline hypertension, systolic BP increase of ≥20 mmHg or diastolic BP increase of ≥10 mmHg (at 2 consecutive visits for the average of 3 measurements); or the initiation of, or increase in dose of, medication for the treatment of hypertension.

**Supplementary Table 6. Change From Baseline to Day 28 in In-Clinic Systolic BP, Diastolic BP, and Heart Rate (Safety Set)**

| <b>Parameter, Mean (SD)</b>    | <b>Placebo<br/>(N=108)</b> | <b>Vibegron<br/>(N=106)</b> |
|--------------------------------|----------------------------|-----------------------------|
| <b>Systolic BP, mmHg</b>       |                            |                             |
| Baseline                       | 122.3 (14.3)               | 119.6 (15.1)                |
| Day 28                         | 119.9 (12.7)               | 120.3 (15.2)                |
| Change from baseline at day 28 | -2.6 (13.5)                | 0.4 (10.9)                  |
| <b>Diastolic BP, mmHg</b>      |                            |                             |
| Baseline                       | 76.5 (8.3)                 | 75.2 (8.6)                  |
| Day 28                         | 74.7 (8.5)                 | 75.2 (7.9)                  |
| Change from baseline at day 28 | -1.8 (8.1)                 | -0.2 (6.5)                  |
| <b>Heart rate, bpm</b>         |                            |                             |
| Baseline                       | 70.4 (8.9)                 | 71.9 (9.6)                  |
| Day 28                         | 69.1 (10.1)                | 71.2 (9.4)                  |
| Change from baseline at day 28 | -1.1 (7.4)                 | -0.8 (7.3)                  |

BP, blood pressure.



**Supplementary Figure 1.** Patient disposition. FAS, full analysis set.

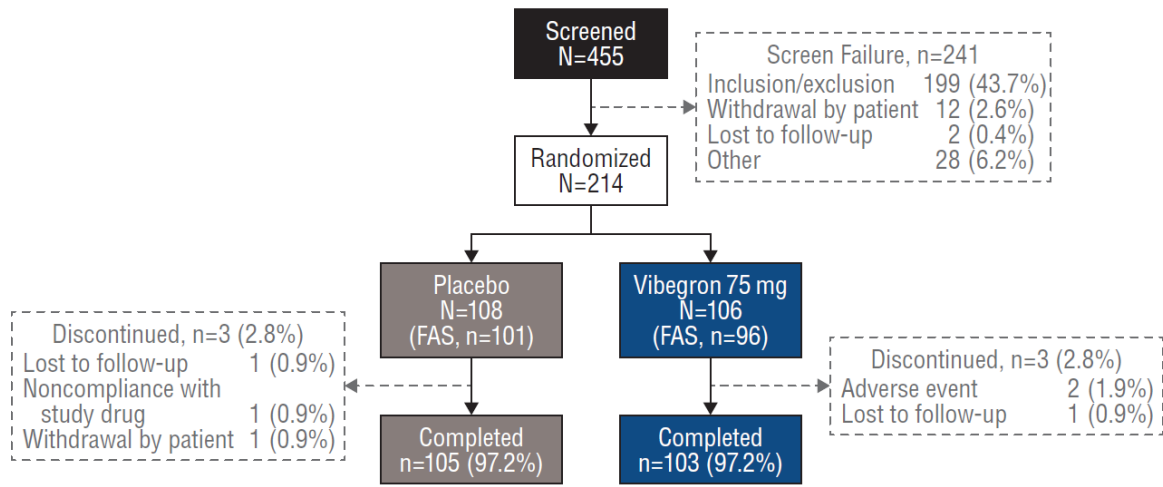

**Supplementary Figure 2.** Mean 24-hour ambulatory heart rate for placebo (left) and vibegron (right).

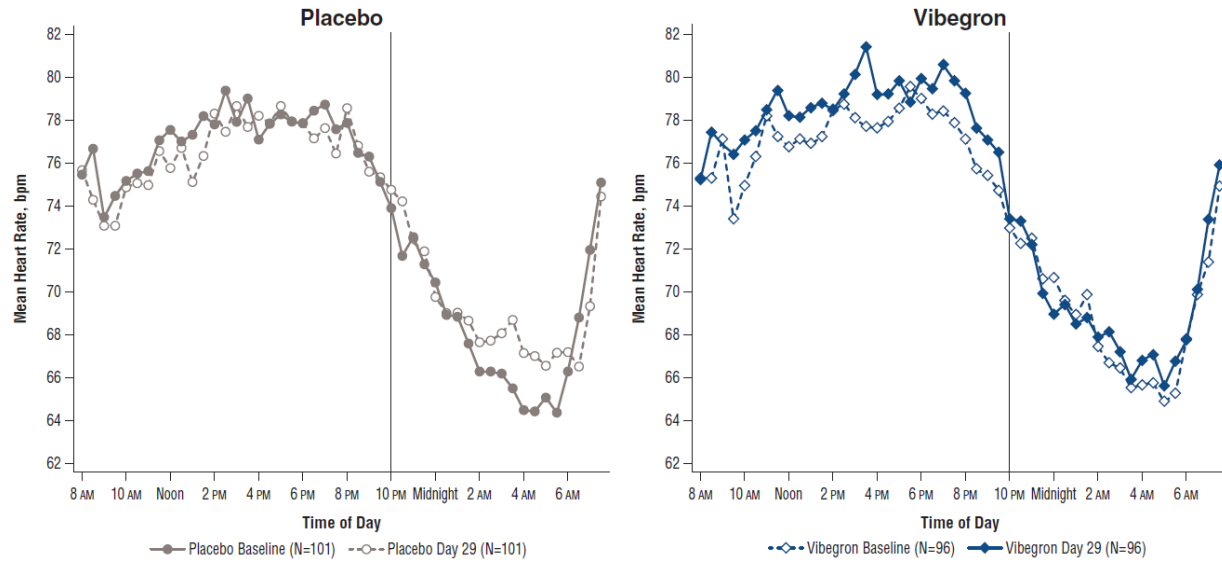

Supplement: bpmj-27-128-s001.pdf [file bpmj-27-128-s001.pdf]
